# Supplementary material for: VEGFR2 Trafficking by KIF13B Is a Novel Therapeutic Target for Wet Age-Related Macular Degeneration
Source: PubMed Central journal article supplement — Invest Ophthalmol Vis Sci. 2021 Feb 3;62(2):5. doi: 10.1167/iovs.62.2.5 (PMC7862734; doi:10.1167/iovs.62.2.5), 2021-02-03
Supplement: iovs-62-2-5_s001.pdf [file iovs-62-2-5_s001.pdf]

1 **VEGFR2 trafficking by KIF13B is a novel therapeutic target for wet AMD**

2

3 **Stephen B. Waters<sup>1</sup>, Christopher Zhou<sup>1</sup>, Tara Nguyen<sup>2</sup>, Ruth Zelkha<sup>2</sup>, Hyun Lee<sup>3</sup>, Andrius**  
4 **Kazlauskas<sup>2,4</sup>, Mark I. Rosenblatt<sup>2</sup>, Asrar B. Malik<sup>1</sup>, and Kaori H. Yamada<sup>1,\*</sup>,**

5 \*Address correspondence to Kaori H. Yamada: Phone: 312-996-1906; e-mail: [horiguch@uic.edu](mailto:horiguch@uic.edu)

6

7

8 **Supplementary information**

9 **Supplementary Figures and Figure Legends**

10

**A**

| Unique | Total | Gene    | XCorr | $\Delta$ Corr |
|--------|-------|---------|-------|---------------|
| 24     | 28    | KIF13B  | 5.477 | 0.478         |
| 11     | 11    | VEGFR2  | 5.079 | 0.528         |
| 5      | 6     | PDGFR a | 4.858 | 0.509         |
| 5      | 5     | PDGFR b | 4.838 | 0.501         |
| 5      | 5     | NRP1    | 4.841 | 0.585         |
| 1      | 1     | EGFR    |       |               |

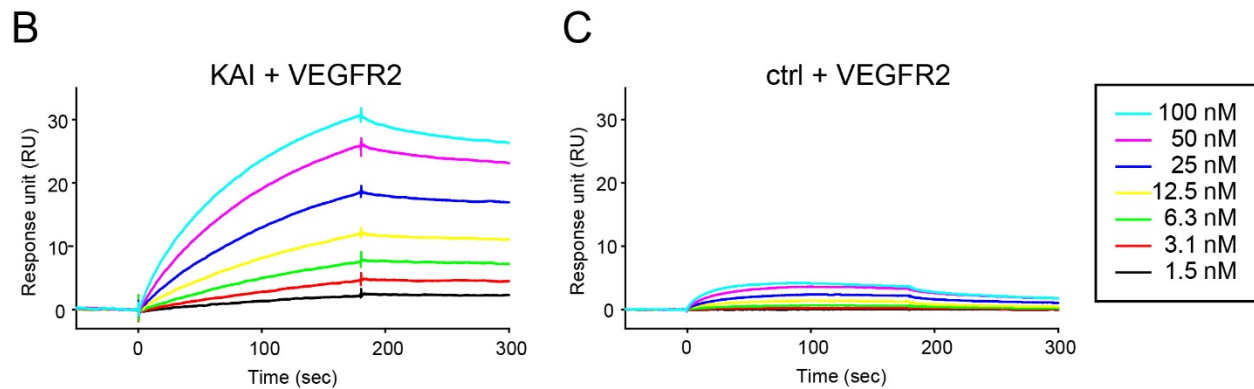

1  
2 **Supplementary Figure 1. VEGFR2 has a high affinity to KAI, not to ctrl** (A) Mass  
3 spectrometry analysis of the proteins which bound to the biotin-KAI immobilized on the  
4 streptavidin beads. After the digestion of the proteins, peptide fragments were analyzed based on  
5 the molecular weight to determine the parental proteins. The number of the total and unique  
6 peptide fragments, the name of the determining gene, cross-correlation (XCorr), and delta  
7 correlation ( $\Delta$ Corr) were shown in the table. (B) Biotin-KAI was immobilized on the  
8 streptavidin (SA) sensor chip surface, and affinity to the recombinant protein of cytosolic  
9 VEGFR2 was tested. (C) Biotin-ctrl was immobilized on the SA sensor chip. Even a high  
10 concentration of VEGFR2 did not show any affinity to ctrl.

11

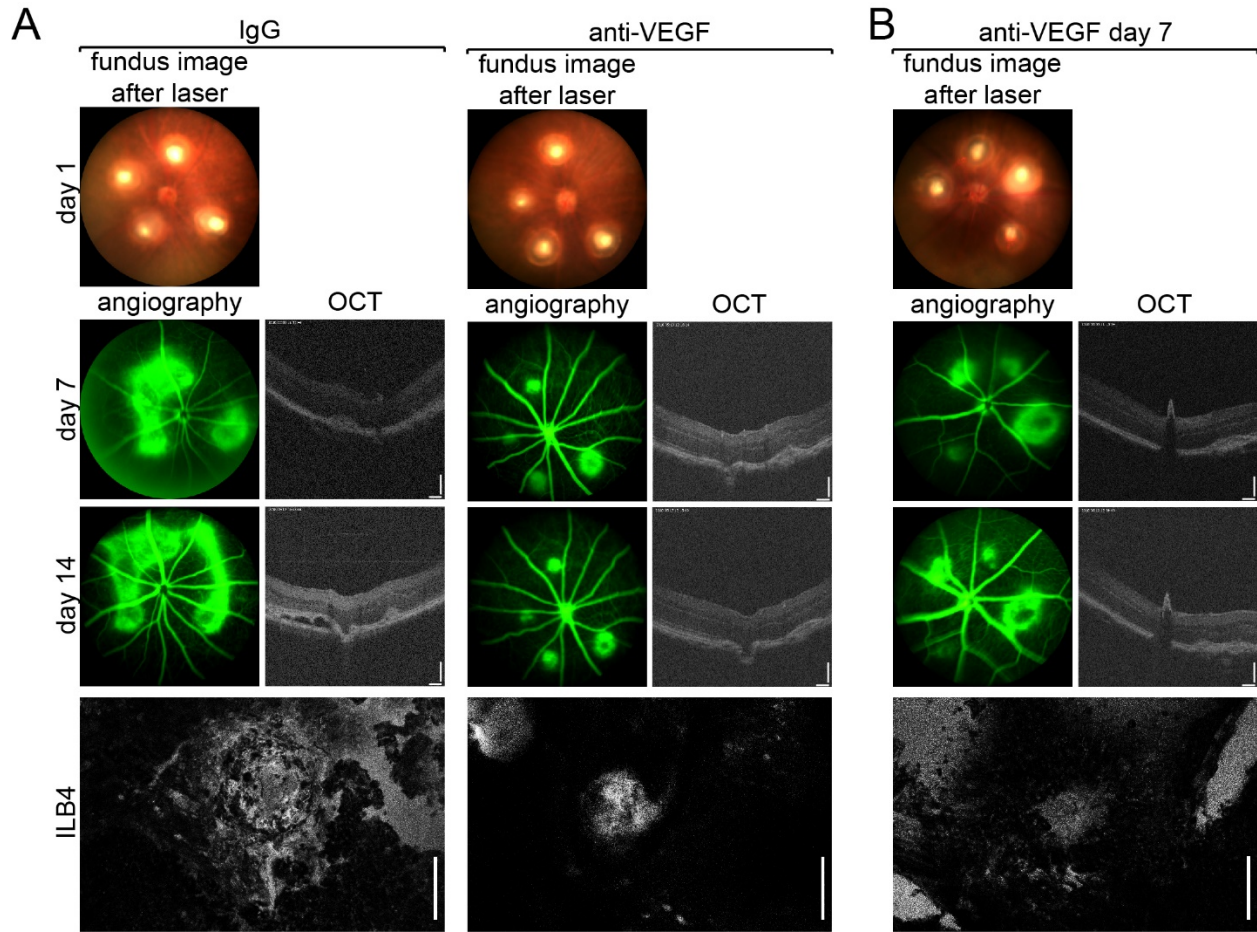

1  
2 **Supplementary Figure 2. Comparison of the efficacy of our strategy with current therapy**  
3 **for wet AMD, anti-VEGF.** (A) Efficacy of anti-VEGF antibody on laser-induced CNV. After  
4 laser photocoagulation, mice received intravitreal injection of IgG or anti-VEGF antibody 2  
5  $\mu\text{g}/\text{eye}$  on day 1. Represent images of the laser burn at day 1, OCT, and angiography at days 7  
6 and 14, and staining of the flat-mount of choroid/sclera with ILB4 on day 14 were shown. Bars:  
7 100  $\mu\text{m}$  for OCT, 200  $\mu\text{m}$  for ILB4 staining. (B) Regression of CNV by treatment of intravitreal  
8 injection anti-VEGF antibody after CNV was developed. After laser burn, mice were left  
9 untreated for 7 days. On day 7, group #7 mice received an intravitreal injection of anti-VEGF

1 antibody 2  $\mu\text{g}/\text{eye}$ . The representative images of the fundus image after laser burn at day 1,  
2 angiography, and OCT at day 7 before the treatment started, and day 14 after the treatment  
3 started were shown. The quantitative data from A and B were analyzed and shown in Fig. 3B, C.  
4

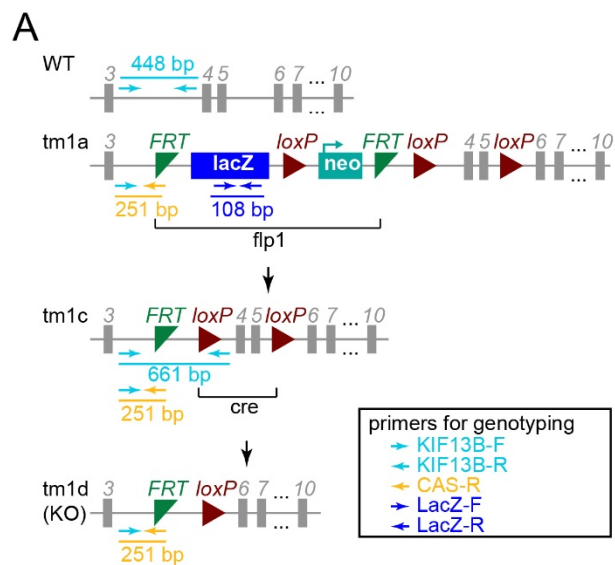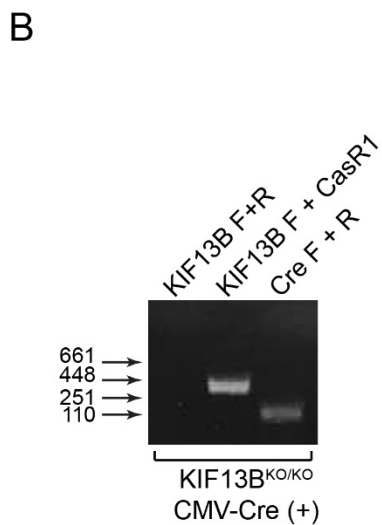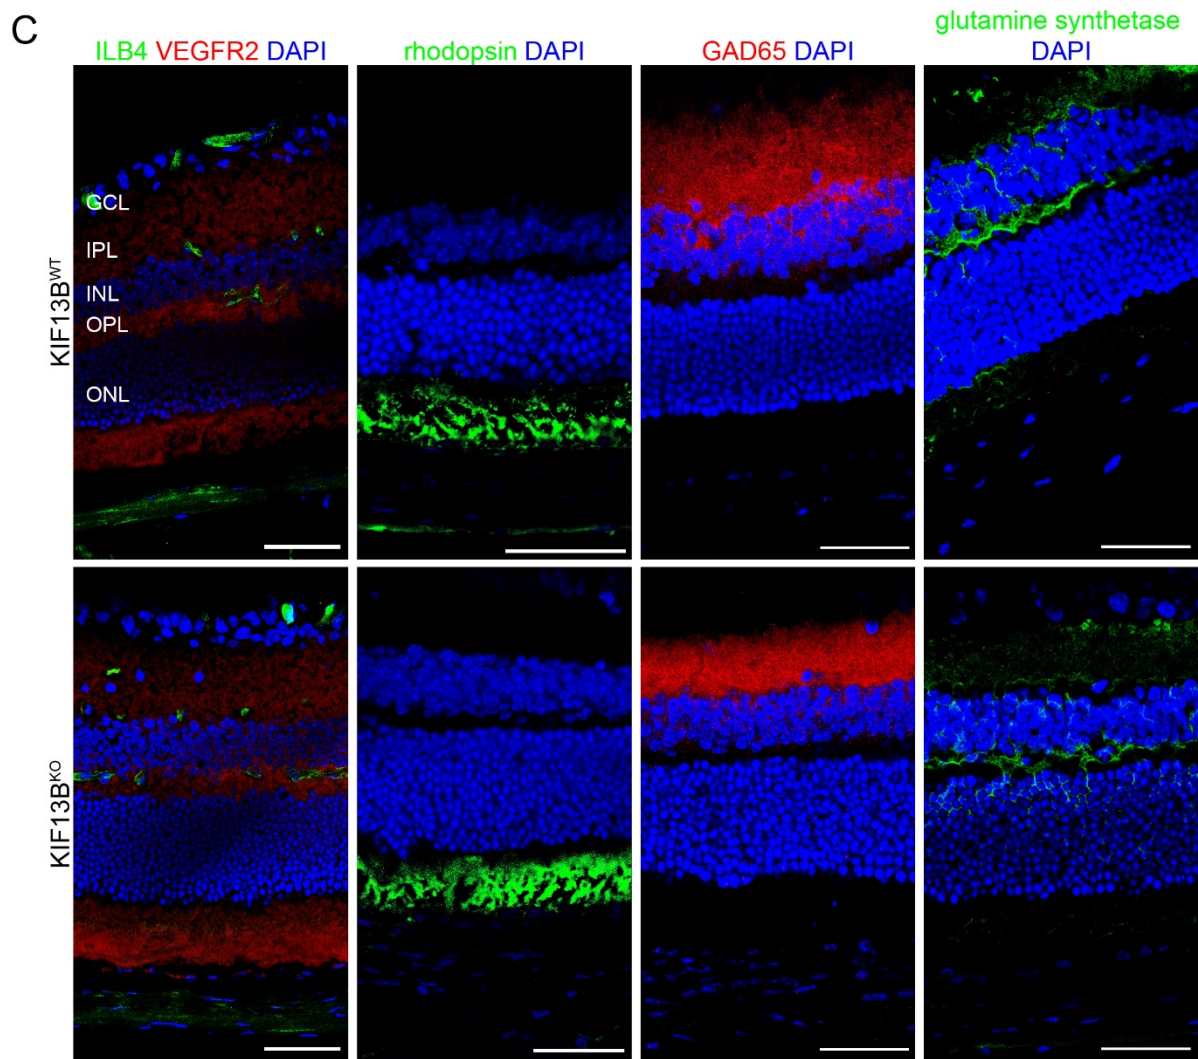

1 **Supplementary Figure 3. Generation of global KIF13B KO mice** (A) Scheme of KIF13B  
2 WT and a mutant allele. (B) Representative image of genotyping shows that the WT allele using  
3 *KIF13B-F* and *KIF13B-R* primers (448 bp) was absent in KIF13B<sup>KO</sup>. The existence of FRT  
4 cassettes was confirmed with *KIF13B-F* and *CAS-R* primers (251 bp). CMV-Cre was also  
5 confirmed with Cre-F and Cre-R primers (100 bp). (C) Immunostaining of the cryosection of the  
6 eyes from *KIF13B<sup>WT</sup>* and *KIF13B<sup>KO</sup>*. Intact eyes were isolated from *KIF13B<sup>WT</sup>* and *KIF13B<sup>KO</sup>*.  
7 Cryosection of the eyes was analyzed by immunostaining with VEGFR2, ILB4, rhodopsin,  
8 GAD65, and glutamine synthetase. No abnormality was noted in *KIF13B<sup>KO</sup>*. Scale bar: 50  $\mu$ m.  
9

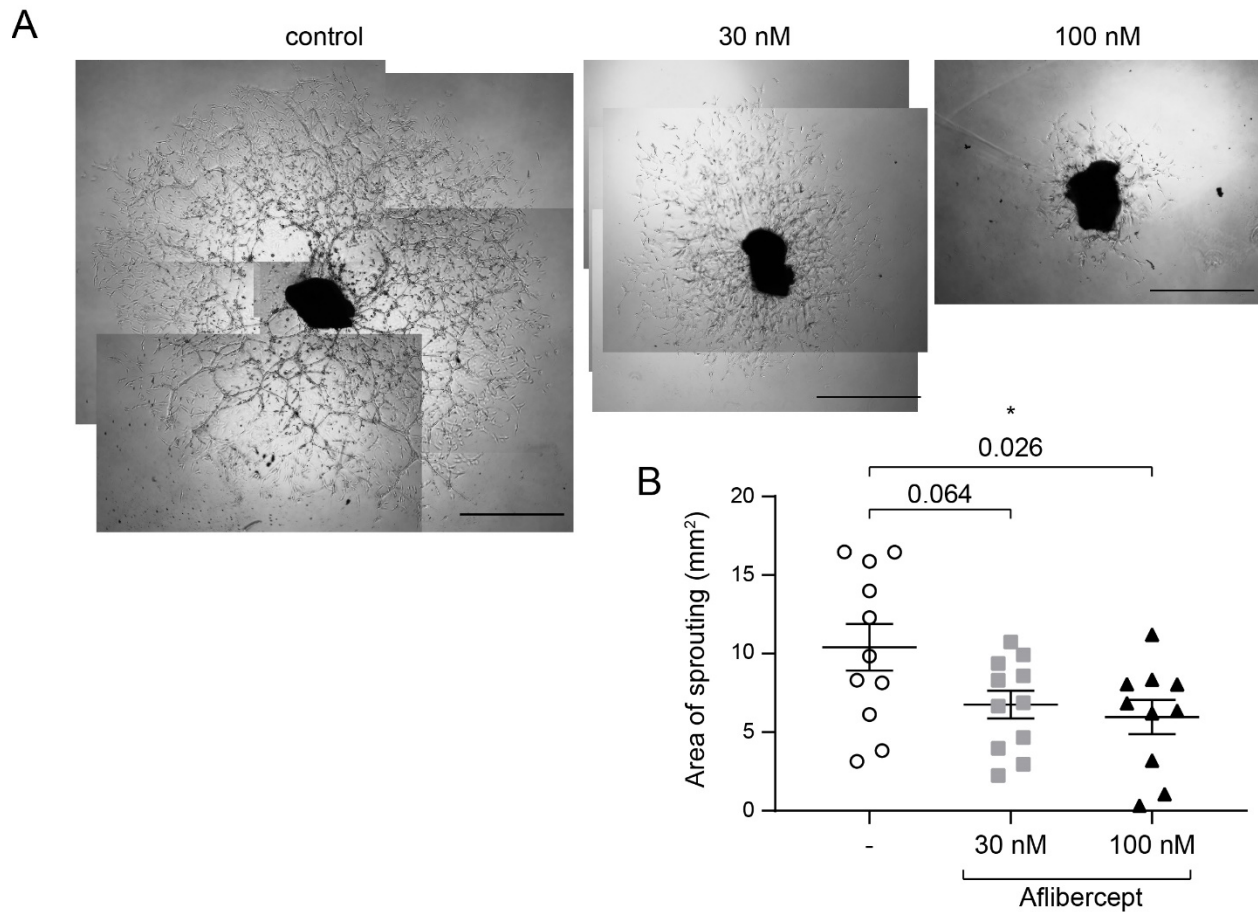

1  
2 **Supplementary Figure 4. VEGF-dependent sprouting from choroidal tissue *ex vivo*.** (A, B)  
3 Choroidal tissue fragments were isolated from C57BL/6 mouse eyes, embedded in Matrigel, and  
4 incubated in basal media supplemented with 2% FBS without growth factors with or without  
5 Aflibercept 30 nM or 100 nM. Tissue fragments dissected from the same animal were divided  
6 into 3 groups (control, 30 nM, and 100 nM Aflibercept) and tested at the same time. The  
7 independent experiment was repeated 3 times. The sprouting area from each fragment was  
8 measured and plotted in graph B as average  $\pm$  SE. N=11, 11, 10, for control, 30, 100 nM  
9 Aflibercept, respectively. N is the number of fragments in each group from 3 independent  
10 experiments. One-way ANOVA.
